# Supplementary material for: Lymph node dendritic cells harbor inducible replication-competent HIV despite years of suppressive ART
Source: PubMed Central journal article supplement — Cell Host Microbe. Author manuscript; Available in PMC 2024 May 3. (PMC11068440; doi:10.1016/j.chom.2023.08.020), 2023-09-25
Supplement: NIHMS1981255-supplement-Supplemental_Information.pdf [file NIHMS1981255-supplement-Supplemental_Information.pdf]

**Supplemental information**

**Lymph node dendritic cells harbor inducible  
replication-competent HIV despite years  
of suppressive ART**

**Riddhima Banga, Francesco Andrea Procopio, Erica Lana, Gregory T. Gladkov, Isabelle Roseto, Elizabeth M. Parsons, Xiaodong Lian, Marie Armani-Tourret, Maxime Bellefroid, Ce Gao, Annamaria Kauzlaric, Mathilde Foglierini, Oscar Alfageme-Abello, Susanna H.M. Sluka, Olivia Munoz, Andrea Mastrangelo, Craig Fenwick, Yannick Muller, Catherine Gerald Mkindi, Claudia Daubenberger, Matthias Cavassini, Rafael Trunfio, Sébastien Déglise, Jean-Marc Corpataux, Mauro Delorenzi, Mathias Lichterfeld, Giuseppe Pantaleo, and Matthieu Perreau**

# Supplemental Fig. 1

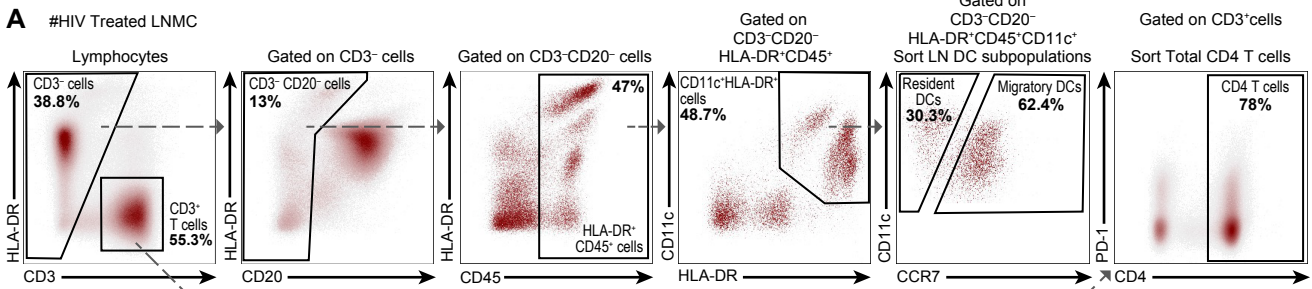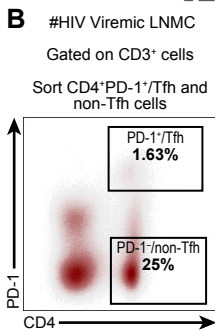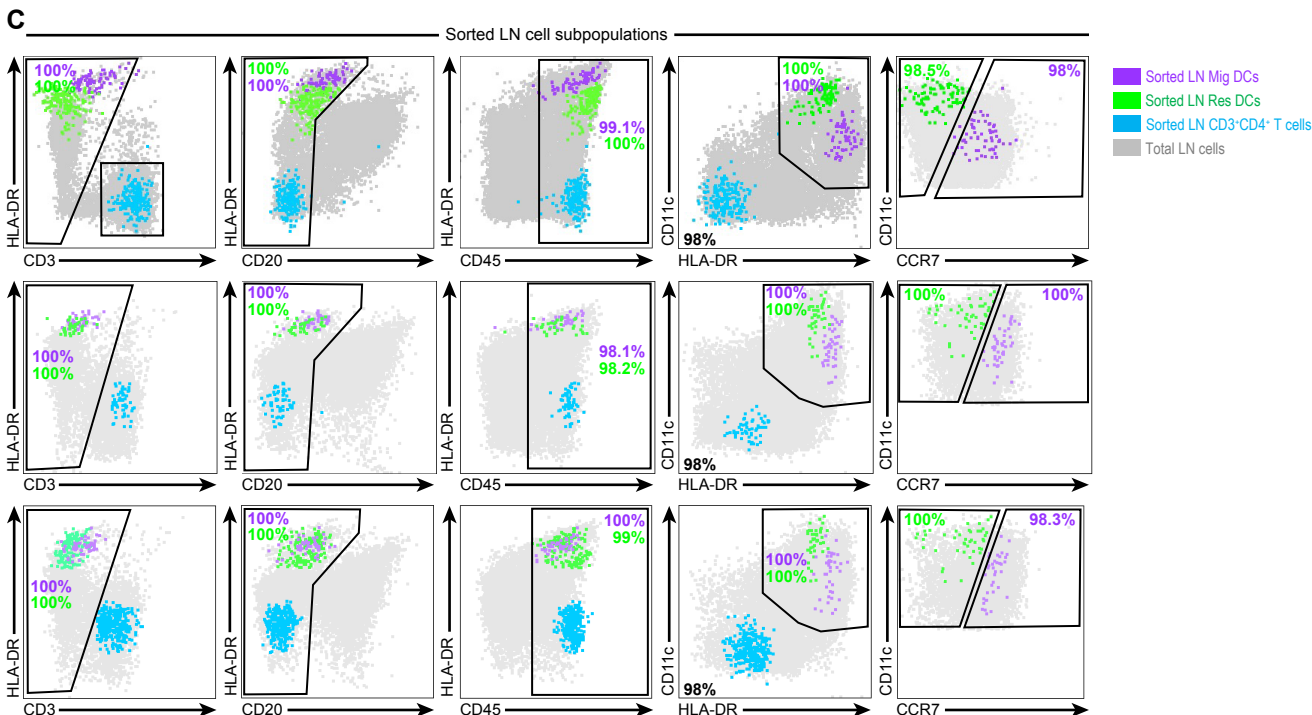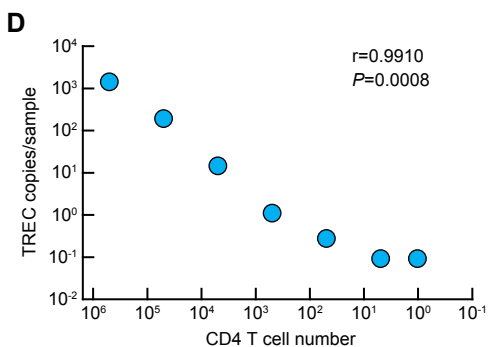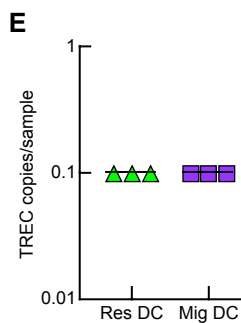

**Figure. S1 (Related to Figure 1 and Figure 4): Gating strategy for sorting LN resident and migratory DCs and purity analyses.** (A) Representative flow cytometry profiles of the gating strategy for sorting LN resident and migratory DCs from a representative ART treated HIV-infected individual (#136). Upon exclusion of T and B cells, myeloid DCs were identified within the CD11c<sup>+</sup> fraction and distinguished into LN resident DCs (CD3<sup>-</sup>CD20<sup>-</sup>HLA-DR<sup>+</sup>CD45<sup>+</sup>CD11c<sup>+</sup>CCR7<sup>-</sup>) and LN migratory DCs (CD3<sup>-</sup>CD20<sup>-</sup>HLA-DR<sup>+</sup>CD45<sup>+</sup>CD11c<sup>+</sup>CCR7<sup>+</sup>). (B) Representative flow cytometry profile of the gating strategy for sorting LN PD-1<sup>+</sup>/Tfh and PD-1<sup>-</sup>/non Tfh cells from a representative viremic HIV-infected individual (#1024). (C) Purity analysis of sorted LN cell populations *i.e.* LN resident and migratory DCs and CD4 T cells overlaid on unsorted total LN cells from three representative ART treated HIV-infected individuals. Purity for all sorting experiments was  $\geq 98\%$ . (D) Detection of TREC copies in sorted CD4 T cells at various cell concentrations ( $5 \cdot 10^5$ -1 cell). (E) Detection of TREC copies in 40,000 sorted LN resident and migratory DCs from HIV uninfected individuals (N=3). Total LN cells are represented in grey (C), LN migratory DCs are depicted in violet (C and E), LN resident DCs are depicted in green (C and E) and LN CD4 T cells are depicted in blue (C and D). Red bars correspond to mean  $\pm$  SEM (E). Statistical significance ( $*=P<0.05$ ) was obtained using Spearman rank test (D).

# Supplemental Fig. 2

**A** #HIV Treated LNMC

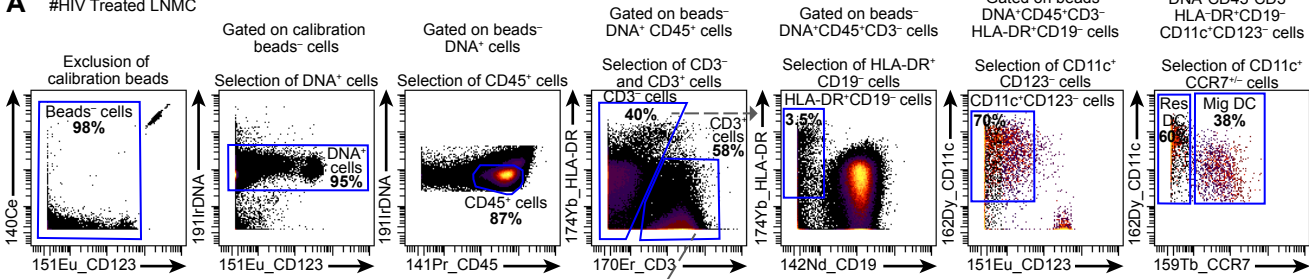

**B**

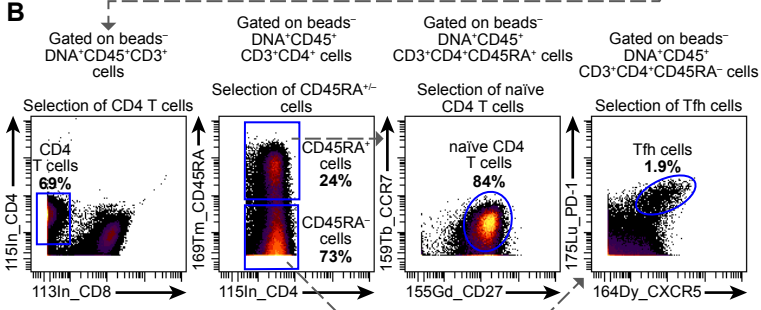

**Figure. S2 (Related to Figure 2): Mass cytometry gating strategy for LN mononuclear cell populations.** (A) Representative example of gating strategy for LN resident and migratory DCs of an aviremic ART treated HIV-infected individual (#155). (B) Representative example of gating strategy for naïve CD4 T cells and LN Tfh cells of an aviremic ART treated HIV-infected individual (#155).

# Supplemental Fig. 3

**A**
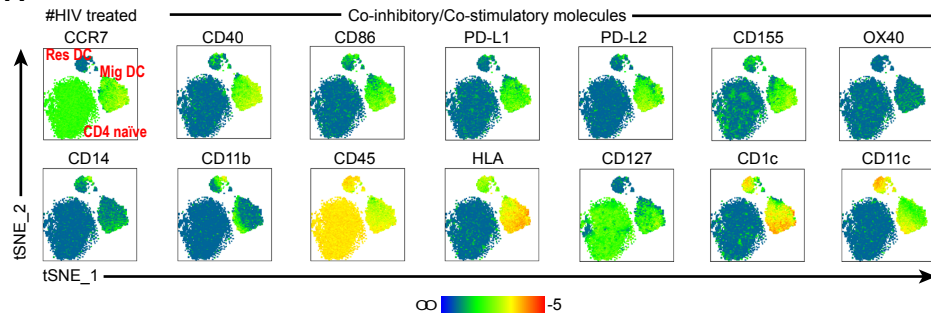
**B**
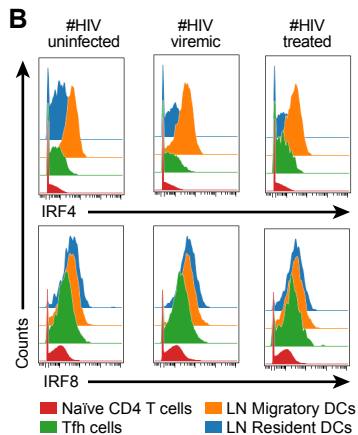
**C**
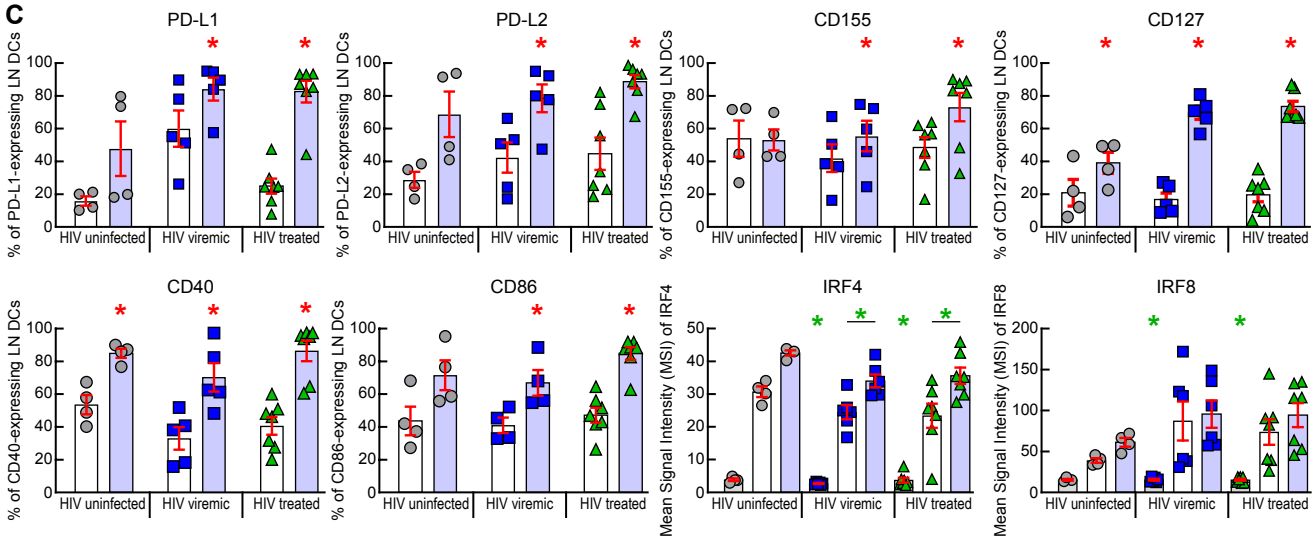

**Figure. S3 (Related to Figure 2): Phenotypic characterization of LN resident and migratory DCs by mass cytometry.** (A) Representative t-distributed stochastic neighbor embedding (t-SNE) plots representing the surface expression patterns of co-stimulatory molecules (CD40, OX-40 and CD86), immunoregulatory molecules (PD-L1, PD-L2 and CD155) and other molecules (CD14, CD11b, CD45, HL-DR, CD127, CD1c and CD11c) on naïve CD4 T cells, LN migratory and LN resident DCs from a representative ART treated HIV-infected individual (#161). (B) Representative mass cytometry profile of expression levels of transcription factors IRF4 and IRF8 in naïve CD4 T cells, LN Tfh cells, LN resident and LN migratory DCs isolated directly *ex vivo* from a representative HIV uninfected, viremic (#1009) and aviremic ART treated HIV-infected individual (#163). (C) Cumulative data representing the frequencies of LN migratory and resident DCs expressing PD-L1, PDL2, CD155, CD127, CD40 and CD86 in HIV-uninfected (N=4), viremic (N=5) and aviremic ART treated HIV-infected individuals (N=7) or the Mean signal intensity (MSI) values of IRF4 and IRF8 in naïve CD4 T cells, LN migratory and resident DCs isolated directly *ex vivo* from HIV uninfected (N=4), viremic (N=6) and ART treated HIV-infected individuals (N=7). Red histograms correspond to naïve CD4 T cells, green histograms correspond to LN Tfh cells, orange histograms correspond to LN migratory DCs and blue histograms correspond to LN resident DCs (B). Grey circles correspond to HIV-uninfected individuals, blue squares corresponds to viremic HIV-infected individuals and green triangles correspond to aviremic ART treated HIV-infected individuals (C). Red bars correspond to mean  $\pm$  SEM (C). Red stars indicate statistical significance ( $*=P<0.05$ ) for intra-group comparisons. Green stars indicate statistical significance ( $*=P<0.05$ ) for intra-group comparisons of LN migratory DCs, LN resident DCs and naïve CD4 T cells. Statistical significance ( $P$  values) was obtained using one-way ANOVA (Kruskal-Wallis test) followed by a two-tailed paired t-test.

# Supplemental Fig. 4

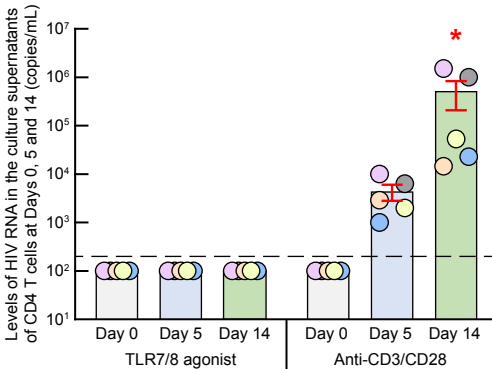



**Figure. S4 (Related to Figure 6): Levels of HIV RNA in the culture supernatants of LN CD4 T cells exposed to TLR7/8 agonist treatment.** Levels of HIV production in purified LN CD4 T cell culture supernatants of ART treated HIV-infected individuals (N=5) at days 0, 5 and 14 post-exposure to TLR7/8 agonist as assessed by HIV RNA levels (copies/mL). HIV-infected individuals are color coded. Red bars correspond to mean  $\pm$  SEM (C). Red stars indicate statistical significance ( $*=P<0.05$ ). Statistical significance ( $P$  values) was obtained using one-way ANOVA (Kruskal-Wallis test) followed by Wilcoxon Matched-pairs one-tailed Signed Rank test.

**Supplemental Table 3 (Related to Figure 1). HIV-specific CD8 T-cell responses in ART treated HIV-infected individuals**

| <b>HIV treated individuals</b> | <b>Peptide sequences</b> | <b>SFU/million</b> |
|--------------------------------|--------------------------|--------------------|
| <b>#136</b>                    | RDYVDRFFKTL              | 227                |
|                                | TPQVPLRPM                | 192                |
|                                | SPAIFQSSM                | 162                |
|                                | WHLGHGVSII               | 140                |
|                                | total SFU/million        | <b>721</b>         |
| <b>#142</b>                    | YPLTFGWCY                | <b>233</b>         |
| <b>#169</b>                    | VPLDEDFRKY               | 150                |
|                                | IEELRQHLL                | 140                |
|                                | total SFU/million        | <b>290</b>         |

**Supplemental Table 4 (Related to Figure 4). All Flip-seq sequences obtained for viremic HIV-infected individuals**

| Patient | LN cell population     | Cell count before extraction | LTRgag Count after extraction | % of cells with LTRgag | Total cells assayed | Total HIV Sequences | Intact | Defective      |    |                 |                       |     |              |
|---------|------------------------|------------------------------|-------------------------------|------------------------|---------------------|---------------------|--------|----------------|----|-----------------|-----------------------|-----|--------------|
|         |                        |                              |                               |                        |                     |                     |        | Defects in PSI | LD | LD/Hypermuation | LD/Internal Inversion | PSC | Hypermuation |
| 1024    | Mig DC                 | 3.00E+05                     | 1.76E+03                      | 0.6                    | 5,684               | 1                   | 1      | -              | -  | -               | -                     | -   | -            |
|         | Res DC                 | 2.80E+05                     | 1.40E+03                      | 0.5                    | 7,146               | 2                   | -      | -              | 1  | 1               | -                     | -   | -            |
|         | PD-1 <sup>+</sup> /Tfh | 3.00E+05                     | 2.08E+04                      | 6.9                    | 5,292               | 9                   | 2      | 0              | 5  | 2               | -                     | -   | -            |
|         | PD-1 <sup>-</sup>      | 3.00E+05                     | 2.64E+03                      | 0.9                    | 41,967              | 5                   | -      | -              | 4  | -               | -                     | 1   | -            |
| 1019    | Mig DC                 | 1.96E+05                     | 4.32E+02*                     | 0.2                    | 3,476               | 1                   | -      | -              | 1  | -               | -                     | -   | -            |
|         | Res DC                 | 1.80E+05                     | 1.80E+02*                     | 0.1                    | 8,322               | 1                   | 1      | -              | -  | -               | -                     | -   | -            |
|         | PD-1 <sup>+</sup> /Tfh | 2.70E+05                     | 3.29E+04                      | 12.2                   | 1,826               | 4                   | 2      | -              | 1  | 1               | -                     | -   | -            |
|         | PD-1 <sup>-</sup>      | 3.00E+05                     | 7.81E+03                      | 2.6                    | 3,743               | -                   | -      | -              | -  | -               | -                     | -   | -            |
| 1025    | Mig DC                 | 3.00E+05                     | 1.10E+03                      | 0.4                    | 6,600               | 1                   | 1      | -              | -  | -               | -                     | -   | -            |
|         | Res DC                 | 3.00E+05                     | 7.77E+01*                     | 0.03                   | 19,305              | 2                   | 2      | -              | -  | -               | -                     | -   | -            |
|         | PD-1 <sup>+</sup> /Tfh | 3.00E+05                     | 4.33E+04                      | 14.4                   | 3,663               | 2                   | -      | -              | 1  | -               | 1                     | -   | -            |
|         | PD-1 <sup>-</sup>      | 3.00E+05                     | 2.31E+03*                     | 0.8                    | 1,601               | -                   | -      | -              | -  | -               | -                     | -   | -            |

Asterix (\*) refers to quantifications at limit of detection. When no intact HIV-1 sequences were detected, the limit of detection was calculated as two times the number of cells analyzed without target identification. Percentage of HIV-infected cells harboring at least 1 copy of HIV was calculated as follows: LTR HIVgag count (copies) / cell count before extraction\*100.

**Supplemental Table 5 (Related to Figure 4). All MIP-seq sequences obtained for viremic HIV-infected individuals**

| Patient | LN cell population     | Total cells assayed | Total HIV Sequences | Intact | Defective      |     |                   |                        |     |               |
|---------|------------------------|---------------------|---------------------|--------|----------------|-----|-------------------|------------------------|-----|---------------|
|         |                        |                     |                     |        | Defects in PSI | LD  | LD/ Hypermutation | LD/ Internal Inversion | PSC | Hypermutation |
| 1024    | Mig DC                 | 23,012              | 6                   | 2      | -              | 2   | -                 | -                      | 2   | -             |
|         | Res DC                 | 36,286              | 9                   | 4      | -              | 5   | -                 | -                      | -   | -             |
|         | PD-1 <sup>+</sup> /Tfh | 619                 | 4                   | 1      | -              | 3   | -                 | -                      | -   | -             |
|         | PD-1 <sup>-</sup>      | 0                   | -                   | -      | -              | -   | -                 | -                      | -   | -             |
| 1019    | Mig DC                 | 3,476               | 1                   | 1      | -              | -   | -                 | -                      | -   | -             |
|         | Res DC                 | 11,927              | 1                   | 0      | -              | 1   | -                 | -                      | -   | -             |
|         | PD-1 <sup>+</sup> /Tfh | 348                 | 2                   | 0*     | -              | -   | -                 | -                      | -   | -             |
|         | PD-1 <sup>-</sup>      | 0                   | -                   | -      | -              | -   | -                 | -                      | -   | -             |
| 1025    | Mig DC                 | 5,984               | 1                   | 1      | -              | -   | -                 | -                      | -   | -             |
|         | Res DC                 | 26,255              | 0                   | 0      | -              | -   | -                 | -                      | -   | -             |
|         | PD-1 <sup>+</sup> /Tfh | 228                 | 3                   | 0*     | -              | -   | -                 | -                      | -   | -             |
|         | PD-1 <sup>-</sup>      | NA                  | NA                  | NA     | NA             | -NA | NA                | NA                     | NA  | NA            |

Abbreviations: LD: Large deletions; Pre-mature stop codon. \*Short sequences (<~1200 bp) were not sequenced. NA; Not applicable

**Supplemental Table 6 (Related to Figure 6). Percentage of homology between HIV sequences obtained from VOA culture supernatants of LN CD4 T cells and LN DC subpopulations of treated HIV-infected individuals.**

| <b>Volunteer #104</b>                           |                  |                  |                  |
|-------------------------------------------------|------------------|------------------|------------------|
| <b>Reverse Transcriptase (1158 nucleotides)</b> |                  |                  |                  |
| Cell populations                                | CD4 T cells      | Resident DCs     | Migratory DCs    |
| CD4 T cells                                     |                  | 99 (6 mismatch)  | 100              |
| Resident DCs                                    | 99 (6 mismatch)  |                  | 99 (6 mismatch)  |
| Migratory DCs                                   | 100              | 99 (6 mismatch)  |                  |
| <b>Protease (297 nucleotides)</b>               |                  |                  |                  |
| Cell populations                                | CD4 T cells      | Resident DCs     | Migratory DCs    |
| CD4 T cells                                     |                  | 99 (3 mismatch)  | 100              |
| Resident DCs                                    | 99 (3 mismatch)  |                  | 99 (3 mismatch)  |
| Migratory DCs                                   | 100              | 99 (3 mismatch)  |                  |
| <b>Integrase (867 nucleotides)</b>              |                  |                  |                  |
| Cell populations                                | CD4 T cells      | Resident DCs     | Migratory DCs    |
| CD4 T cells                                     |                  | 100 (2 mismatch) | 100              |
| Resident DCs                                    | 100 (2 mismatch) |                  | 100 (2 mismatch) |
| Migratory DCs                                   | 100              | 100 (2 mismatch) |                  |
| <b>Volunteer #109</b>                           |                  |                  |                  |
| <b>Reverse Transcriptase (1158 nucleotides)</b> |                  |                  |                  |
| Cell populations                                | CD4 T cells      | Resident DCs     | Migratory DCs    |
| CD4 T cells                                     |                  | NA               | NA               |
| Resident DCs                                    | NA               |                  | 99 (8 mismatch)  |
| Migratory DCs                                   | NA               | 99               |                  |
| <b>Protease (297 nucleotides)</b>               |                  |                  |                  |
| Cell populations                                | CD4 T cells      | Resident DCs     | Migratory DCs    |
| CD4 T cells                                     |                  | NA               | NA               |
| Resident DCs                                    | NA               |                  | 98 (8 mismatch)  |
| Migratory DCs                                   | NA               | 98               |                  |
| <b>Integrase (867 nucleotides)</b>              |                  |                  |                  |
| Cell populations                                | CD4 T cells      | Resident DCs     | Migratory DCs    |
| CD4 T cells                                     |                  | NA               | NA               |
| Resident DCs                                    | NA               |                  | 100 (1 mismatch) |
| Migratory DCs                                   | NA               | 100              |                  |
| <b>Volunteer #133</b>                           |                  |                  |                  |
| <b>Reverse Transcriptase (1158 nucleotides)</b> |                  |                  |                  |
| Cell populations                                | CD4 T cells      | Resident DCs     | Migratory DCs    |
| CD4 T cells                                     |                  | 100              | 100              |
| Resident DCs                                    | 100              |                  | 100              |
| Migratory DCs                                   | 100              | 100              |                  |
| <b>Protease (297 nucleotides)</b>               |                  |                  |                  |
| Cell populations                                | CD4 T cells      | Resident DCs     | Migratory DCs    |
| CD4 T cells                                     |                  | 100              | 100              |
| Resident DCs                                    | 100              |                  | 100              |
| Migratory DCs                                   | 100              | 100              |                  |
| <b>Integrase (867 nucleotides)</b>              |                  |                  |                  |
| Cell populations                                | CD4 T cells      | Resident DCs     | Migratory DCs    |
| CD4 T cells                                     |                  | 100              | 100              |
| Resident DCs                                    | 100              |                  | 100              |
| Migratory DCs                                   | 100              | 100              |                  |

\*NA. Not applicable
